# Supplementary material for: The Potential Inhibitory Effects of miR-19b on Ocular Inflammation are Mediated Upstream of the JAK/STAT Pathway in a Murine Model of Allergic Conjunctivitis
Source: PubMed Central journal article supplement — Invest Ophthalmol Vis Sci. 2020 Mar 9;61(3):8. doi: 10.1167/iovs.61.3.8 (PMC7401772; doi:10.1167/iovs.61.3.8), 2020-03-09
Supplement: iovs-61-3-8_s001.pdf [file iovs-61-3-8_s001.pdf]

Figure S1

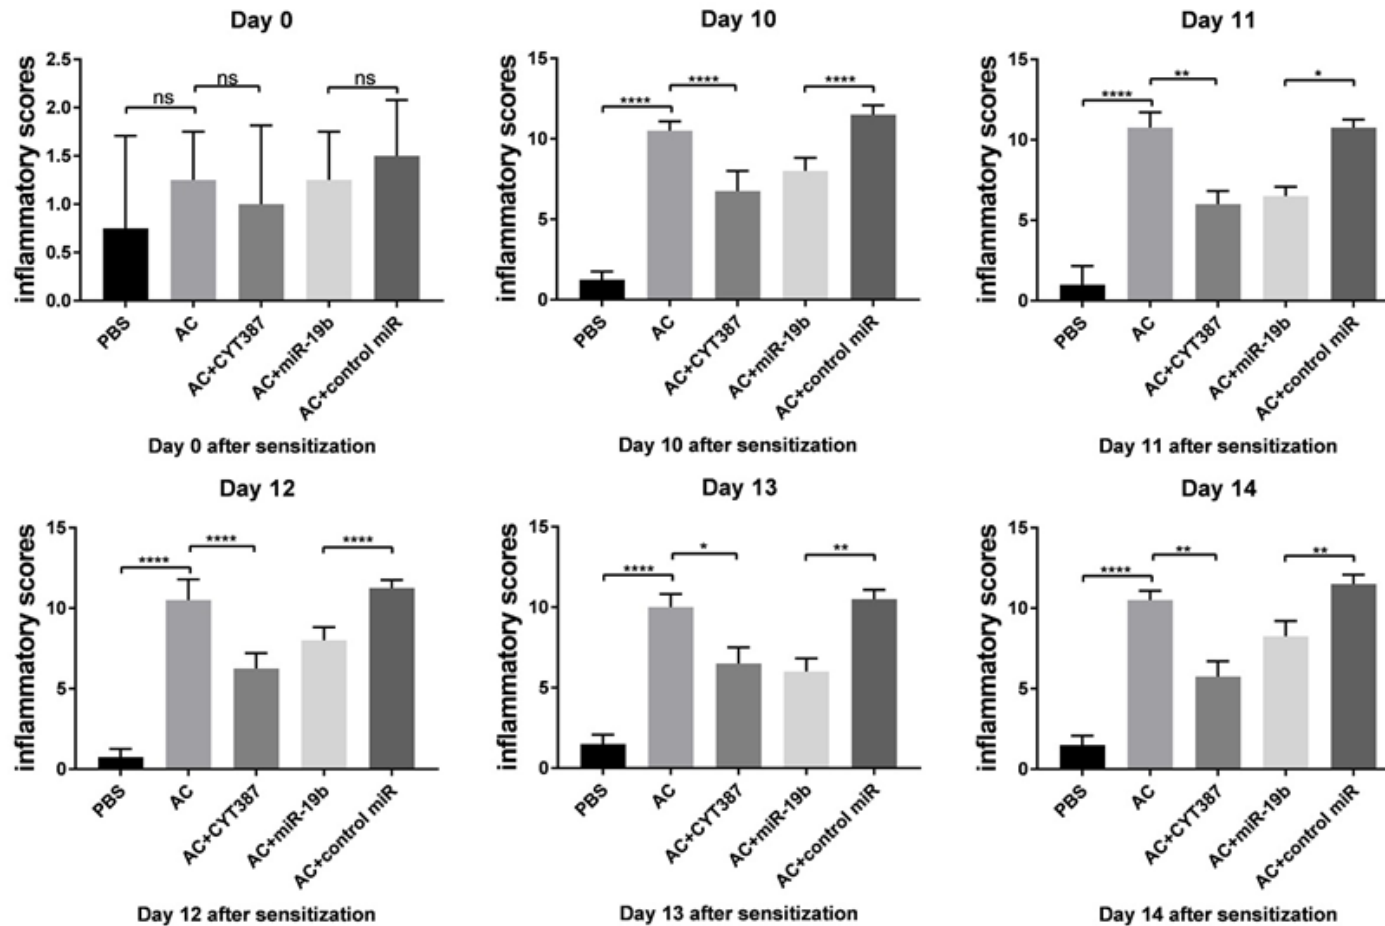

Figure S1. Inflammatory scoring under slit lamp 15~30 min after pollen challenge for clinical sign (Redness, chemosis, discharge and tearing) from day 10 to day 14 after sensitization among PBS group, AC group, AC + CYT387 group, AC + miR-19b group and AC + control miR group. The data were shown as means  $\pm$  SD, n=6. \*P < 0.05, \*\* P < 0.01 \*\*\* P < 0.001 and \*\*\*\* P < 0.0001.
