# Supplementary figures and images for: The Potential Inhibitory Effects of miR-19b on Ocular Inflammation are Mediated Upstream of the JAK/STAT Pathway in a Murine Model of Allergic Conjunctivitis
Source: PubMed Central journal article supplement — Invest Ophthalmol Vis Sci. 2020 Mar 9;61(3):8. doi: 10.1167/iovs.61.3.8 (PMC7401772; doi:10.1167/iovs.61.3.8), 2020-03-09

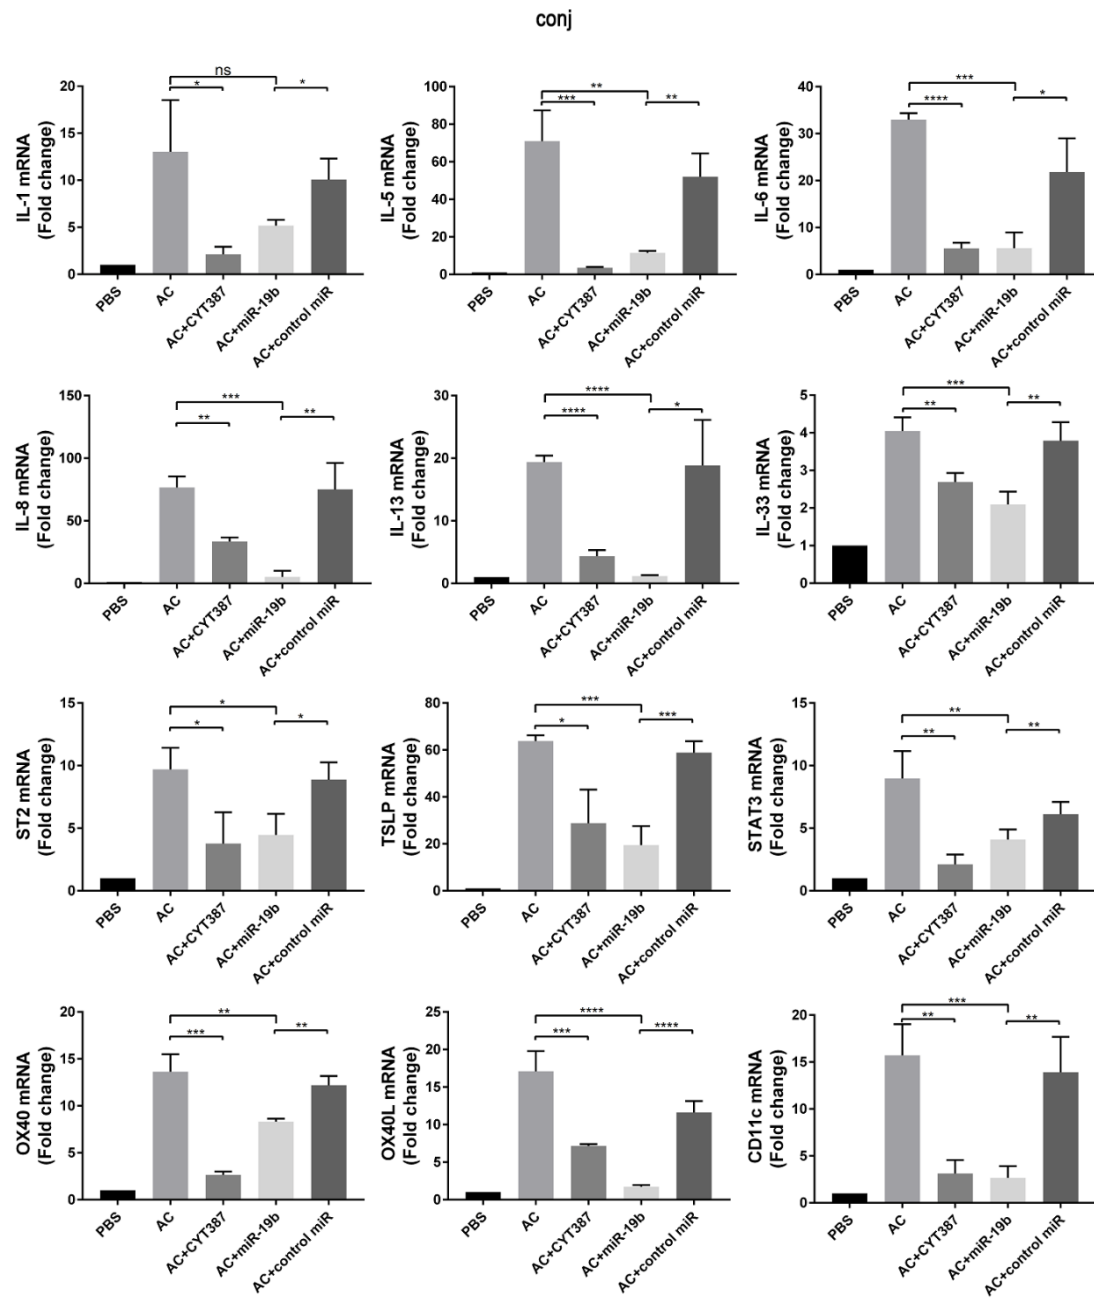

Figure S2A

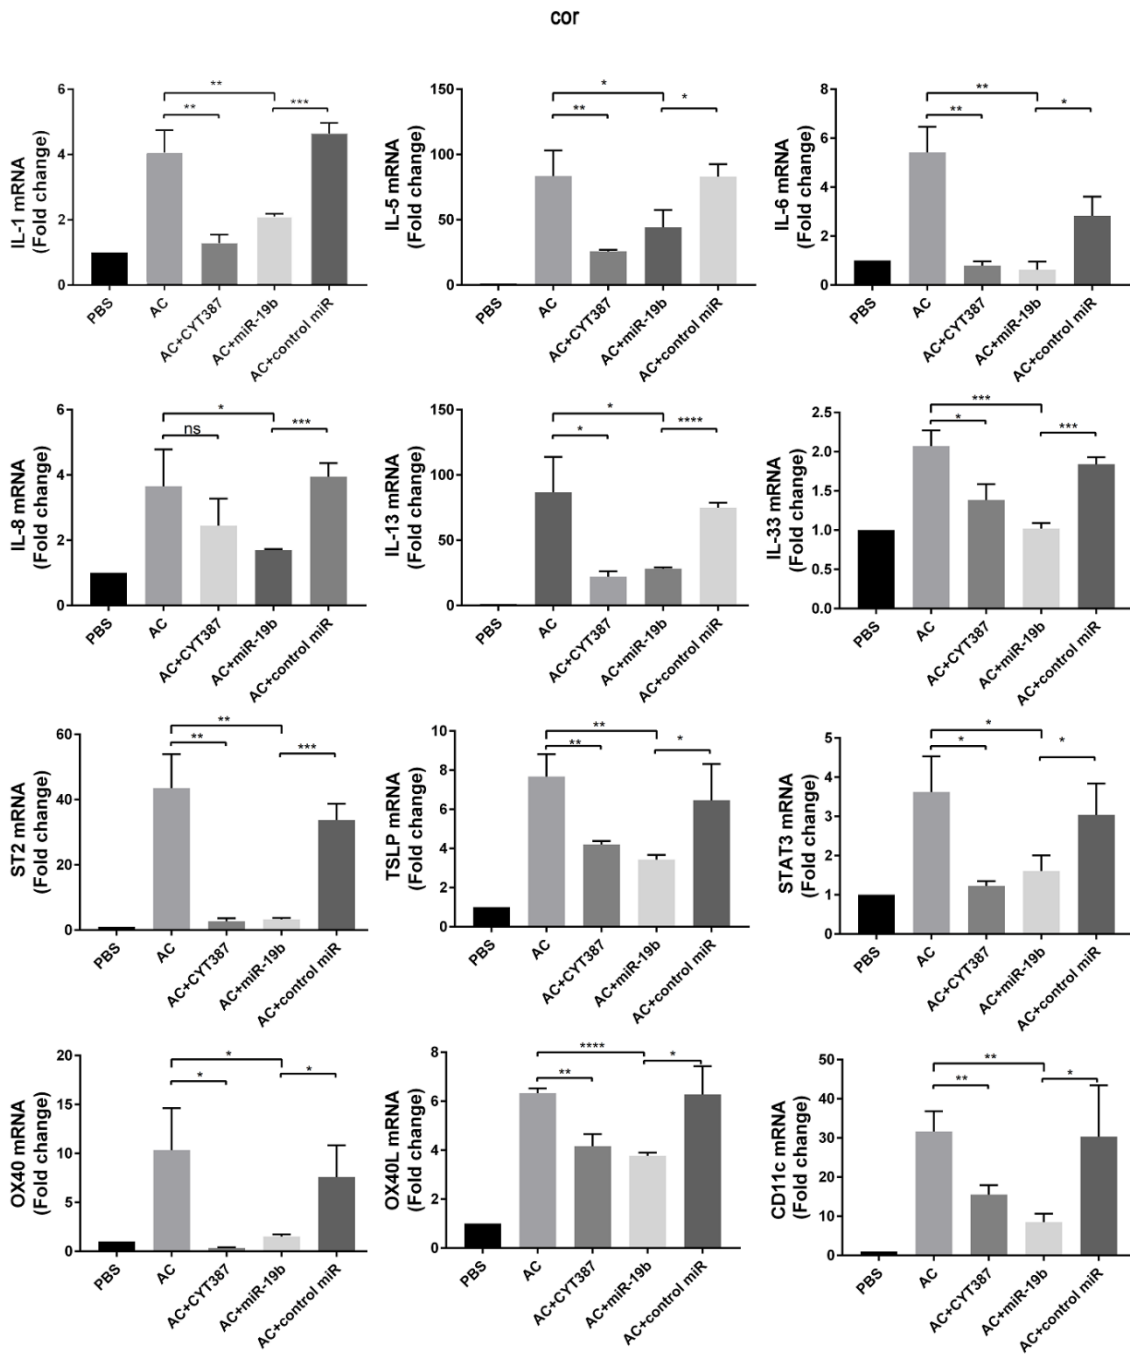

Figure S2B

In

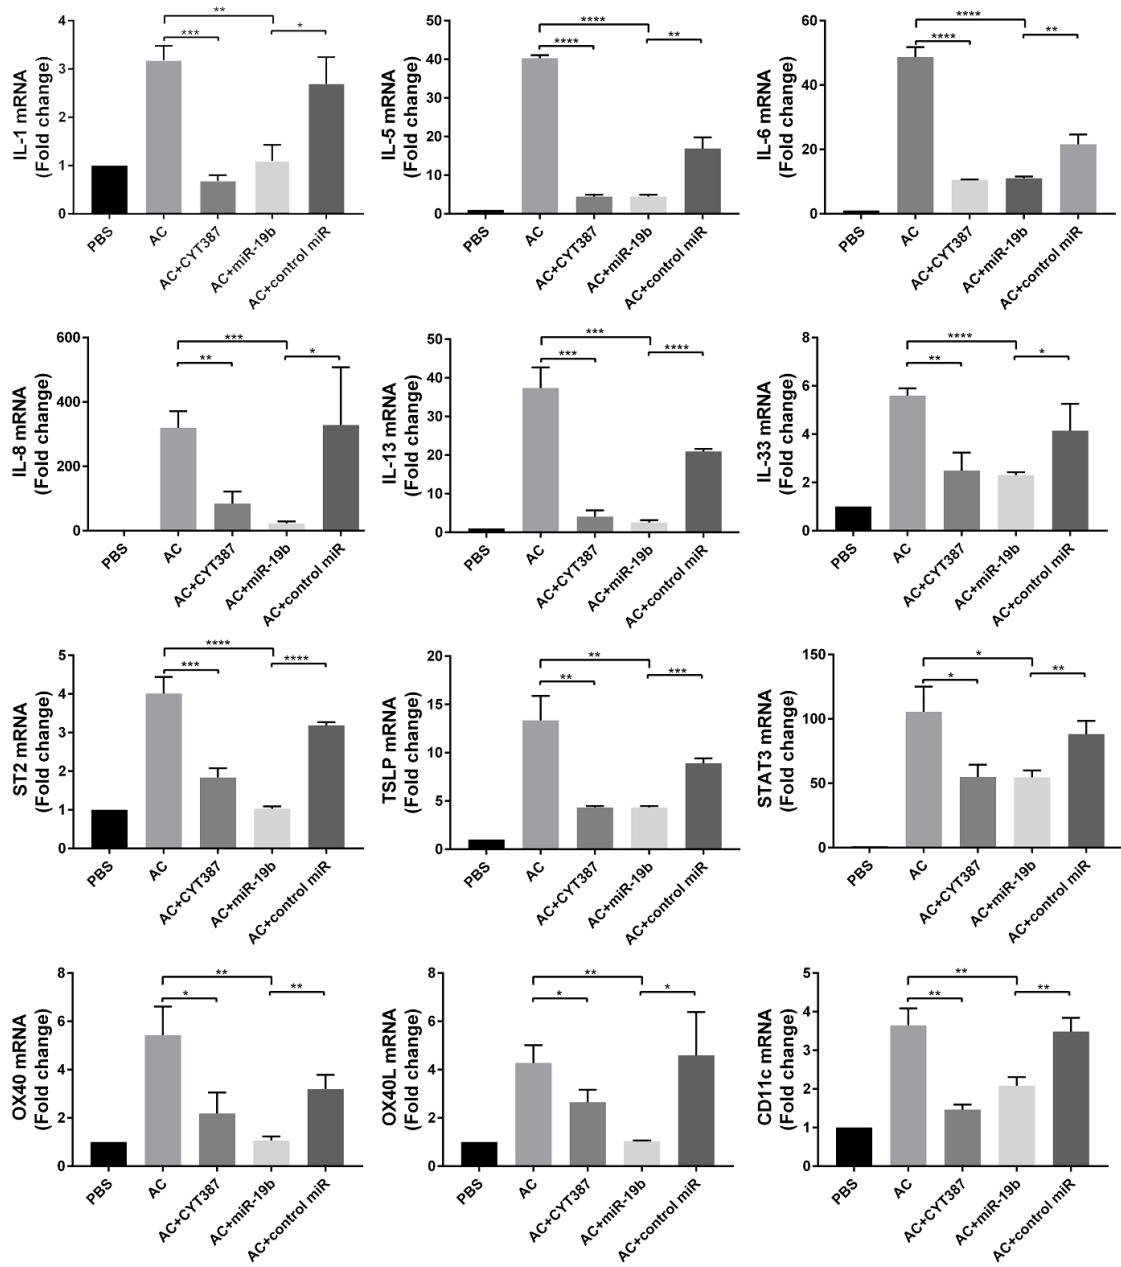

Figure S2C

Supplement: iovs-61-3-8_s002.pdf [file iovs-61-3-8_s002.pdf]
